# Supplementary material for: Molecular simulations of gas transport in hydrogenated nitrile butadiene rubber and ethylene–propylene–diene rubber
Source: Royal Society of Chemistry journal article supplement (doi:10.1039/d0ra00192a), 2020-01-01

## Supplementary materials

### Molecular simulations of gas transport in hydrogenated nitrile butadiene rubber and ethylene-propylene-diene rubber

JingHua Tan,<sup>a</sup> Chenliang Chen,<sup>a</sup> Yiwu Liu,<sup>\*a</sup> Juying Wu,<sup>b</sup> Ding Wu,<sup>a</sup> Xiang Zhang,<sup>a</sup> Xiaoye He,<sup>c</sup> Zhihong She,<sup>a</sup> Ren He<sup>b</sup> and Hailiang Zhang<sup>c</sup>

<sup>a</sup>Key Laboratory of Advanced Packaging Materials and Technology of Hunan Province, School of Packaging and Materials Engineering, Hunan University of Technology, Zhuzhou 412007, P. R. China. E-mail: liuyiwu@hut.edu.cn

<sup>b</sup>Institute of Systems and Engineering, China Academy of Engineering Physics, Mianyang 621000, P. R. China

<sup>c</sup>Key Laboratory of Polymeric Materials and Application Technology of Hunan Province, Key Laboratory of Advanced Functional Polymer Materials of Colleges, Universities of Hunan Province, College of Chemistry, Xiangtan University, Xiangtan 411105, P. R. China

**This PDF file includes:**

**Tables S1**

**Figures S1-S3**

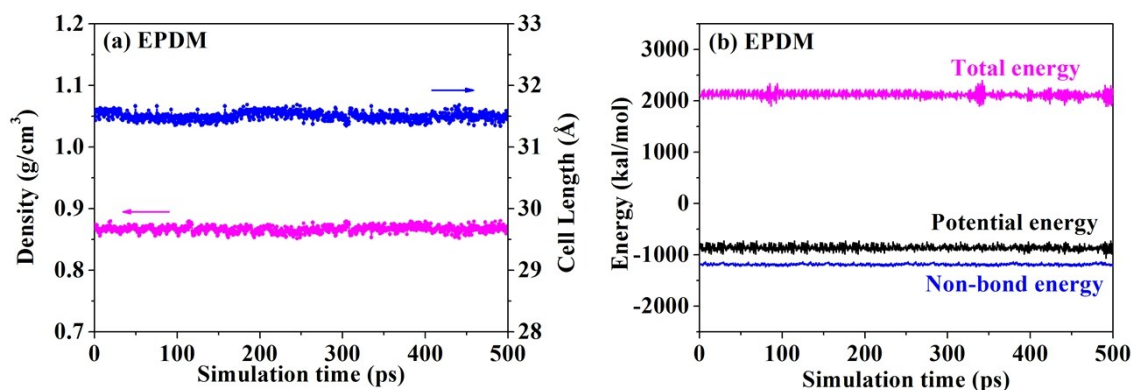

Fig. S1 Plots of (a) density, cell length and (b) energy versus simulation time in the NPT simulation for EPDM.

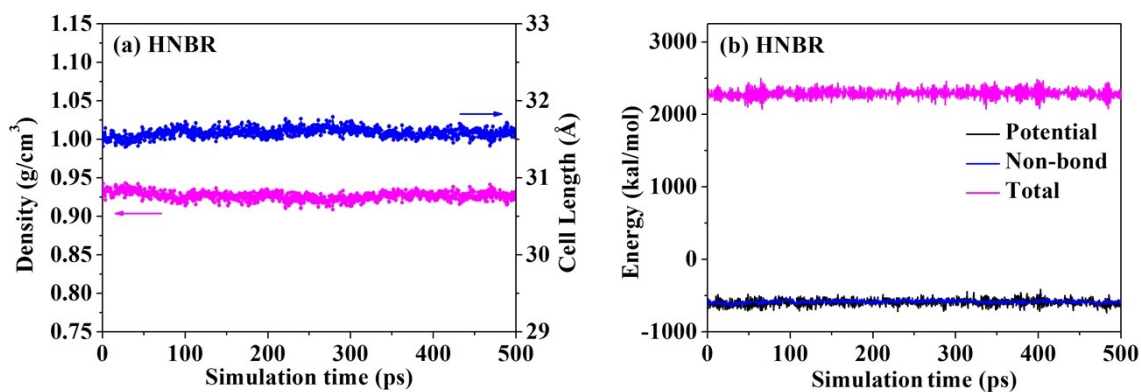

Fig. S2 Plots of (a) density, cell length and (b) energy versus simulation time in the NPT simulation for HNBR.

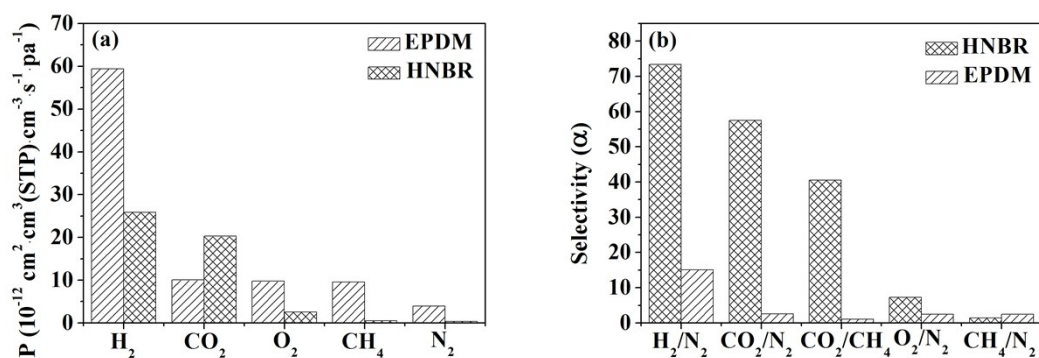

Fig. S3 The (a) permeability coefficients and (b) selectivity of penetrant molecules in HNBR and EPDM

**Table S1** Non-bonded force field parameters for the EPDM and HNBR

| Atom                             | $q$ (e) | Force field type |
|----------------------------------|---------|------------------|
| C1/C2/C3/C4/C5/C7/C9/C12/C13/C17 | -0.106  | c4               |
| C6/C14                           | -0.053  | c43              |
| C8                               | -0.159  | c4               |
| C10/C11/C15                      | -0.127  | c3=              |
| C16                              | -0.254  | c3=              |
| C18                              | 0.141   | c43              |
| C19                              | 0.234   | c2t              |
| H1/H2/H3/H4/H5/H6/H7/H8/H9       | 0.053   | h1               |
| H12/H13/H14/H17/H18              |         |                  |
| H10/H11/H15/H16                  | 0.127   | h1               |
| N                                | -0.428  | n1t              |

  

|                      |        |     |
|----------------------|--------|-----|
| C1/C2/C3             | -0.106 | c4  |
| C4/C6/C7/C8/C10      | -0.053 | c43 |
| C5/C14               | -0.159 | c4  |
| C9/C11               | -0.106 | C4  |
| C12                  | 0      | c3= |
| C13                  | -0.127 | c3= |
| H1/H2/H3/H4/H5/H6    | 0.053  | h1  |
| H7/H8/H9/H10/H11/H13 |        |     |
| H12                  | 0.127  | h1  |

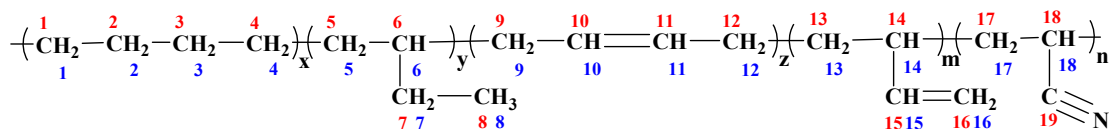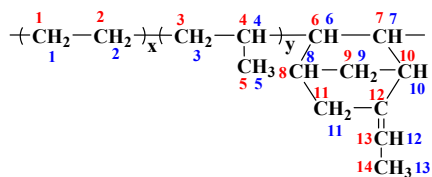

Supplement: d0ra00192a1.pdf [file d0ra00192a1.pdf]
